# Supplementary material
Source: PubMed Central journal article supplement (PMC4859581)
Supplement: JB.00959-15_zjb999094009so1.pdf [file JB.00959-15_zjb999094009so1.pdf]

1 SUPPLEMENTAL MATERIALS AND METHODS

2 *Complementation strain construction*

3 All complementation strains are listed in Table S1. All complementation strains were  
4 constructed by conjugation of a pCM433-based suicide plasmid harboring a wild-type copy of the gene  
5 of interest, into the mutant strains (1). Conjugation was performed with *Escherichia coli* S17-1  $\lambda$ pir  
6 acting as the donor strain as previously described (1).  $\Delta mxaF$ ,  $\Delta mxaI$ , and  $\Delta mxaB$  strains were  
7 complemented using the genes under the control of their native promoter. Multiple attempts were  
8 made to complement the  $\Delta xoxF$  mutant using its native promoter, without success. Therefore, the  
9  $\Delta xoxF$  mutant was complemented using the *tac* promoter, a strong promoter in *M. buryatense* 5GB1 (1).  
10 This complementation technique results in the integration of the complementation construct into the  
11 *M. buryatense* 5GB1C chromosome in regions known to be transcriptionally silent (2). The *mx*  
12 complementation constructs were integrated between genes METBUDRAFT\_2794 and  
13 METBUDRAFT\_2795. The *xoxF* complementation construct was integrated between genes  
14 METBUDRAFT\_1431 and METBUDRAFT\_1432. Sucrose counter-selection was used to unmark all strains  
15 (1).

16 Strain FC52 was conjugated with plasmid pFC37 to create the *mx*  
17 (FC59). Strain FC53 was conjugated with plasmid pFC40 to create the *xoxF* complementation strain  
18 (FC64). The *tac* promoter used in pFC40 was amplified from pAWP89 (1). Strain FC54 was conjugated  
19 with plasmid pFC38 to create the *mx*  
20 pFC39 to create the *mx*  
21 assembly (3). All primers used for plasmid construction are listed in Table S2.

22

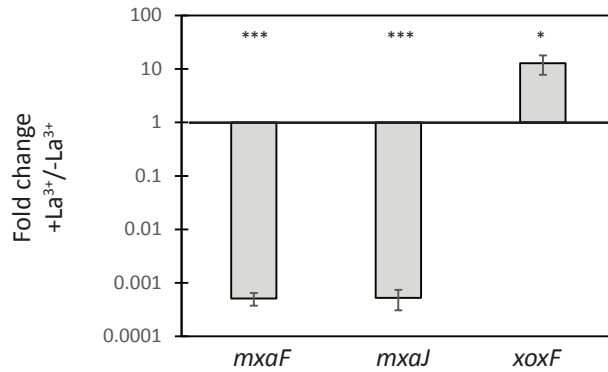

**Supplemental Figure S1. Complementation of  $\Delta mxaB$  restores wild-type lanthanum-dependent gene expression.** qRT-PCR was performed on RNA harvested from the  $\Delta mxaB$  complementation strain grown in the absence or presence of 30 $\mu$ M supplemental lanthanum. Results shown represent the fold change in gene expression in  $\Delta mxaB$  complemented cells grown with lanthanum compared to gene expression in  $\Delta mxaB$  complemented cells grown without lanthanum. Unpaired t-tests were used to determine significance (\*\*= $p < 0.001$ , \*\*= $p < 0.01$ , \*= $p < 0.05$ ) between gene expression levels. Data represent means from three replicates  $\pm$  standard deviations.

23 Table S1. *M. buryatense* 5GB1C strains and plasmids used in this study

| Strain name                | Genotype                                                                                          | Antibiotic resistance |
|----------------------------|---------------------------------------------------------------------------------------------------|-----------------------|
| <i>M. buryatense</i> 5GB1C | Wild-type                                                                                         | None                  |
| FC31                       | METBUDRAFT_2794::P <sub>mx<sub>a</sub>F</sub> -xylE                                               | Unmarked              |
| FC52                       | Δ <i>mx<sub>a</sub>F</i>                                                                          | Unmarked              |
| FC53                       | Δ <i>xoxF</i>                                                                                     | Unmarked              |
| FC54                       | Δ <i>mx<sub>a</sub>I</i>                                                                          | Unmarked              |
| FC57                       | Δ <i>xoxFS</i>                                                                                    | Zeocin                |
| FC59                       | Δ <i>mx<sub>a</sub>F</i> ; METBUDRAFT_2794::P <sub>mx<sub>a</sub>F</sub> - <i>mx<sub>a</sub>F</i> | Unmarked              |
| FC60                       | Δ <i>mx<sub>a</sub>I</i> ; METBUDRAFT_2794::P <sub>mx<sub>a</sub>F</sub> - <i>mx<sub>a</sub>I</i> | Unmarked              |
| FC63                       | Δ <i>mx<sub>a</sub>B</i>                                                                          | Unmarked              |
| FC64                       | Δ <i>xoxF</i> ; METBUDRAFT_::P <sub>tac</sub> - <i>xoxF</i>                                       | Unmarked              |
| FC65                       | Δ <i>mx<sub>a</sub>B</i> ; METBUDRAFT_2794::P <sub>mx<sub>a</sub>B</sub> - <i>mx<sub>a</sub>B</i> | Unmarked              |
| Plasmids                   |                                                                                                   |                       |
| pFC30                      | METBUDRAFT_2794::P <sub>mx<sub>a</sub>F</sub> -xylE                                               | kanamycin             |
| pFC37                      | METBUDRAFT_2794::P <sub>mx<sub>a</sub>F</sub> - <i>mx<sub>a</sub>F</i>                            | kanamycin             |
| pFC38                      | METBUDRAFT_2794::P <sub>mx<sub>a</sub>F</sub> - <i>mx<sub>a</sub>I</i>                            | kanamycin             |
| pFC39                      | METBUDRAFT_2794::P <sub>mx<sub>a</sub>B</sub> - <i>mx<sub>a</sub>B</i>                            | kanamycin             |
| pFC40                      | METBUDRAFT_1431::P <sub>tac</sub> - <i>xoxF</i>                                                   | kanamycin             |

24

25

26 Table S2. Primers used in this study\*

| For function                    | Primer name     | Sequence                                                                   |
|---------------------------------|-----------------|----------------------------------------------------------------------------|
| Gene knockouts                  |                 |                                                                            |
| FRT-zeo-FRT cassette            |                 |                                                                            |
|                                 | FC294_zeoR_F    | <i>gaagttcctatttctagaaagtataggaacttc</i> CTCTGAAATGAGCTGTTGACAATTAATCAT    |
|                                 | FC295_zeoR_R    | <i>gaagttcctatactttctagagaataggaacttc</i> CGTTCATGTCTCCTTTTTTATTTCAGTCCTG  |
| $\Delta xoxF$                   | FC397_xoxFLF_F  | AATAACGATTCGCCCTCTACCAATACC                                                |
|                                 | FC398_xoxFLF_R  | <i>tcagaggaagttcctatactttctagagaataggaacttc</i> GTTGAGGCAATCAGCCAGCTTT     |
|                                 | FC399_xoxFRF_F  | <i>tgaacggaagttcctatttctagaaagtataggaacttc</i> TGGGCGGCACATTAAGTGTATTC     |
|                                 | FC400_xoxFRF_R  | GCTTGTTGTCAAGGTTTCGATC                                                     |
| $\Delta mxaF$                   | FC413_mxaF_LF_F | AGTTGTTGCGCTAATTCGGGTTCC                                                   |
|                                 | FC414_mxaF_LF_R | <i>tcagaggaagttcctatactttctagagaataggaacttc</i> CAACAAGACGCCCCGACACTAAT    |
|                                 | FC415_mxaF_RF_F | <i>tgaacggaagttcctatttctagaaagtataggaacttc</i> TAAAGGAATTGGCGCATCACACC     |
|                                 | FC416_mxaF_RF_R | GATTCCTTGACATAGCGTGCTGCA                                                   |
| $\Delta mxaI$                   | FC434_mxaIIF_F  | TGCAGCACGCTATGTCAAGGAATC                                                   |
|                                 | FC435_mxaIIF_R  | <i>tcagaggaagttcctatactttctagagaataggaacttc</i> GAAGACGACAAAGCAACCGCGAAACT |
|                                 | FC436_mxaIRF_F  | <i>tgaacggaagttcctatttctagaaagtataggaacttc</i> ACCGGCAAGTTTGTATGAGGTAG     |
|                                 | FC437_mxaIRF_R  | GTTTCTTCTTCTCGACCCGGTTG                                                    |
| $\Delta mxaB$                   | FC404_367mxaf_R | GCTTCGGTTTGAATTGCCACA                                                      |
|                                 | FC465_mxaBLF_R  | <i>tcagaggaagttcctatactttctagagaataggaacttc</i> GTGTAGAGTTGGCAAGCGGTTT     |
|                                 | FC466_mxaBRF_F  | <i>ttgaacggaagttcctatttctagaaagtataggaacttc</i> AAACTCGGTGTCAAATCGGTGCG    |
|                                 | FC467_mxaBRF_R  | CAAGGAGAATGTCAAGGCGCTA                                                     |
| pFC30                           |                 |                                                                            |
| <i>xylE</i> gene                | FC328_mdhxylE_F | tgcaaaaatcaatctggaggaattATGAACAAAGGTGTAATGCCA                              |
|                                 | FC329_xylE_R    | tagccatgtttcctcaatggTCAGGTGAGCACGGTCATGAAT                                 |
| $P_{mxaf}$                      | FC130_AP98mdh_R | AATTCCTCCAGATTGATTTTTTCGCA                                                 |
|                                 | AP235_62I_fwd_1 | tcatgcttcatggttaaactgccgaattAATTAACCGGGAATGATGTC                           |
| pFC37                           |                 |                                                                            |
| $P_{mxaf}$ and <i>mxaf</i> gene | FC454_Pmxaf_F   | tcatgcttcatggttaaactgccgaattGTTGTTACTTCTCCATACAATTAACCGGG                  |
|                                 | FC458_mxaFORF_R | atcttagccatgtttcctcaatggTTACAACGAGAACACCATCACGC                            |
| pFC38                           |                 |                                                                            |
| $P_{mxaf}$                      | FC454_Pmxaf_F   | tcatgcttcatggttaaactgccgaattGTTGTTACTTCTCCATACAATTAACCGGG                  |
|                                 | FC459_Pmxaf_R   | gcccagcaataatgtttttcatAATTCCTCCAGATTGATTTTTTCGCATAA                        |
| <i>mxal</i> gene                | FC460_mxaIORF_F | ttatgcaaaaatcaatctggaggaattATGAAAAAACATTATTGCTCGGCGC                       |
|                                 | FC461_mxaIORF_R | atcttagccatgtttcctcaatggTAAATTGATTCTTCTACCTCATAAACAACTTGC                  |
| pFC39                           |                 |                                                                            |
| $P_{mxaB}$ and <i>mxab</i> gene | FC468_mxaBc_F   | ttcatggttaaactgccgaattAATTCCTCCAGATTGATTTTTTCGCATAATG                      |
|                                 | FC469_mxaBc_R   | tagccatgtttcctcaatggTTAGTGCGCCAGATTGTCTATGATG                              |
| pFC40                           |                 |                                                                            |
| $P_{tac}$                       | MH15_dTom_F_new | gtagcaagccattccaacgagtatattcCTCTGAAATGAGCTGTTGACAATTAATC                   |
|                                 | FC343_pMH15R    | AGCTGTTTCCTGTGTGAATACCTCC                                                  |
| <i>xoxF</i> gene                | FC508_Ptacxox_F | ggaggtattcacacaggaacagctATGAAGAAGCCTGTCAAAGCTGG                            |
|                                 | FC509_xoxORF3_R | gtactctgtcactttatgtctattgTAAATTAGGCAATGCGAATACAGTTAATGT                    |
| qRT-PCR                         |                 |                                                                            |
| <i>xoxF</i>                     | FC401_276xoxF_F | ATTCACACTCCATTCCTAACACC                                                    |
|                                 | FC402_550xoxF_R | CTAATGGAGCTTGAGTGTGGTTCATG                                                 |

|             |                          |                          |
|-------------|--------------------------|--------------------------|
| <i>mxoF</i> | FC403_169 <i>mxoF</i> _F | AGTTGTACGACATCAACATCAGG  |
|             | FC404_367 <i>mxoF</i> _R | GCTTCGGTTTGAATTGCCACA    |
| <i>mxoJ</i> | FC405_73 <i>mxoJ</i> _F  | AAGAGCCTCTGAAAGTGTGCAATG |
|             | FC406_313 <i>mxoJ</i> _R | GATAATACGGTTCAGTCGTCAGC  |
| 16S         | FC409_34816S3_F          | ATATTGGACAATGGGCGCAAG    |
|             | FC410_62316S3_R          | CAAATGCCGTTCCCAGGTTAAG   |
| <i>mxoB</i> | FC413_ <i>mxoF</i> _LF_F | AGTTGTTGCGCTAATTCGGGTTC  |
|             | FC464_ <i>mxoB</i> _R    | CAACCGAATATCGTCGTGATGGAC |

---

27 \*Primer regions used for Gibson or PCR stitching junctions are in lower case, FRT sites are italicized

29 **Table S3.** Doubling times of mutant and complementation strains†

| Strain                                                | Without La <sup>3+</sup> | With La <sup>3+</sup> |    |
|-------------------------------------------------------|--------------------------|-----------------------|----|
| WT 5GB1C                                              | 2.97 ± 0.2               | 2.83 ± 0.10           | 30 |
| <i>ΔmxaF</i>                                          | 3.87 ± 0.45              | 2.88 ± 0.24           | 31 |
| <i>ΔmxaF</i> ; P <sub><i>mxaF</i></sub> - <i>mxaF</i> | 2.79 ± 0.05              | 3.13 ± 0.11           | 32 |
| <i>Δmxal</i>                                          | 3.87 ± 0.16              | 2.86 ± 0.12           | 33 |
| <i>Δmxal</i> ; P <sub><i>mxaF</i></sub> - <i>mxal</i> | 2.70 ± 0.03              | 2.90 ± 0.07           | 34 |
| <i>ΔmxaB</i>                                          | 3.07 ± 0.19              | 2.71 ± 0.08           | 35 |
| <i>ΔmxaB</i> ; P <sub><i>mxaB</i></sub> - <i>mxaB</i> | 2.74 ± 0.03              | 2.87 ± 0.14           | 36 |
| <i>ΔxoxF</i>                                          | 2.93 ± 0.07              | 10.3 ± 6.6            | 37 |
| <i>ΔxoxF</i> ; P <sub>tac</sub> - <i>xoxF</i>         | 3.11 ± 0.24              | 2.86 ± 0.11           | 38 |

39 †Doubling times are in hours and represent the means of at least three technical replicates with standard  
 40 deviations. Doubling times were calculated from three time points during the exponential phase of growth.

41

## REFERENCES

42  
43  
44  
45  
46  
47  
48  
49  
50  
51

1. **Puri AW, Owen S, Chu F, Chavkin T, Beck DA, Kalyuzhnaya MG, Lidstrom ME.** 2015. Genetic tools for the industrially promising methanotroph *Methylobacterium buryatense*. *Appl Environ Microbiol* **81**:1775-1781.
2. **Yan X, Chu F, Puri AW, Fu Y, Lidstrom ME.** Submitted. Electroporation-Based Genetic Manipulation In Type I Methanotrophs. *Appl Environ Microbiol*.
3. **Gibson DG, Young L, Chuang RY, Venter JC, Hutchison CA, 3rd, Smith HO.** 2009. Enzymatic assembly of DNA molecules up to several hundred kilobases. *Nat Methods* **6**:343-345.
